# Supplementary material
Source: PubMed Central journal article supplement (PMC4575636)
Supplement: NIHMS713025-supplement-2.pdf [file NIHMS713025-supplement-2.pdf]

Because this study was a meta-analysis, there are no independent and dependent variable instructions, stimulus materials, manipulations, or measures to upload.
